# Supplementary material
Source: HighWire-hosted journal article supplement (https://jech.bmj.com/content/71/1/87)
Supplement: inline-supplementary-material-2 [file inline-supplementary-material-2.pdf]

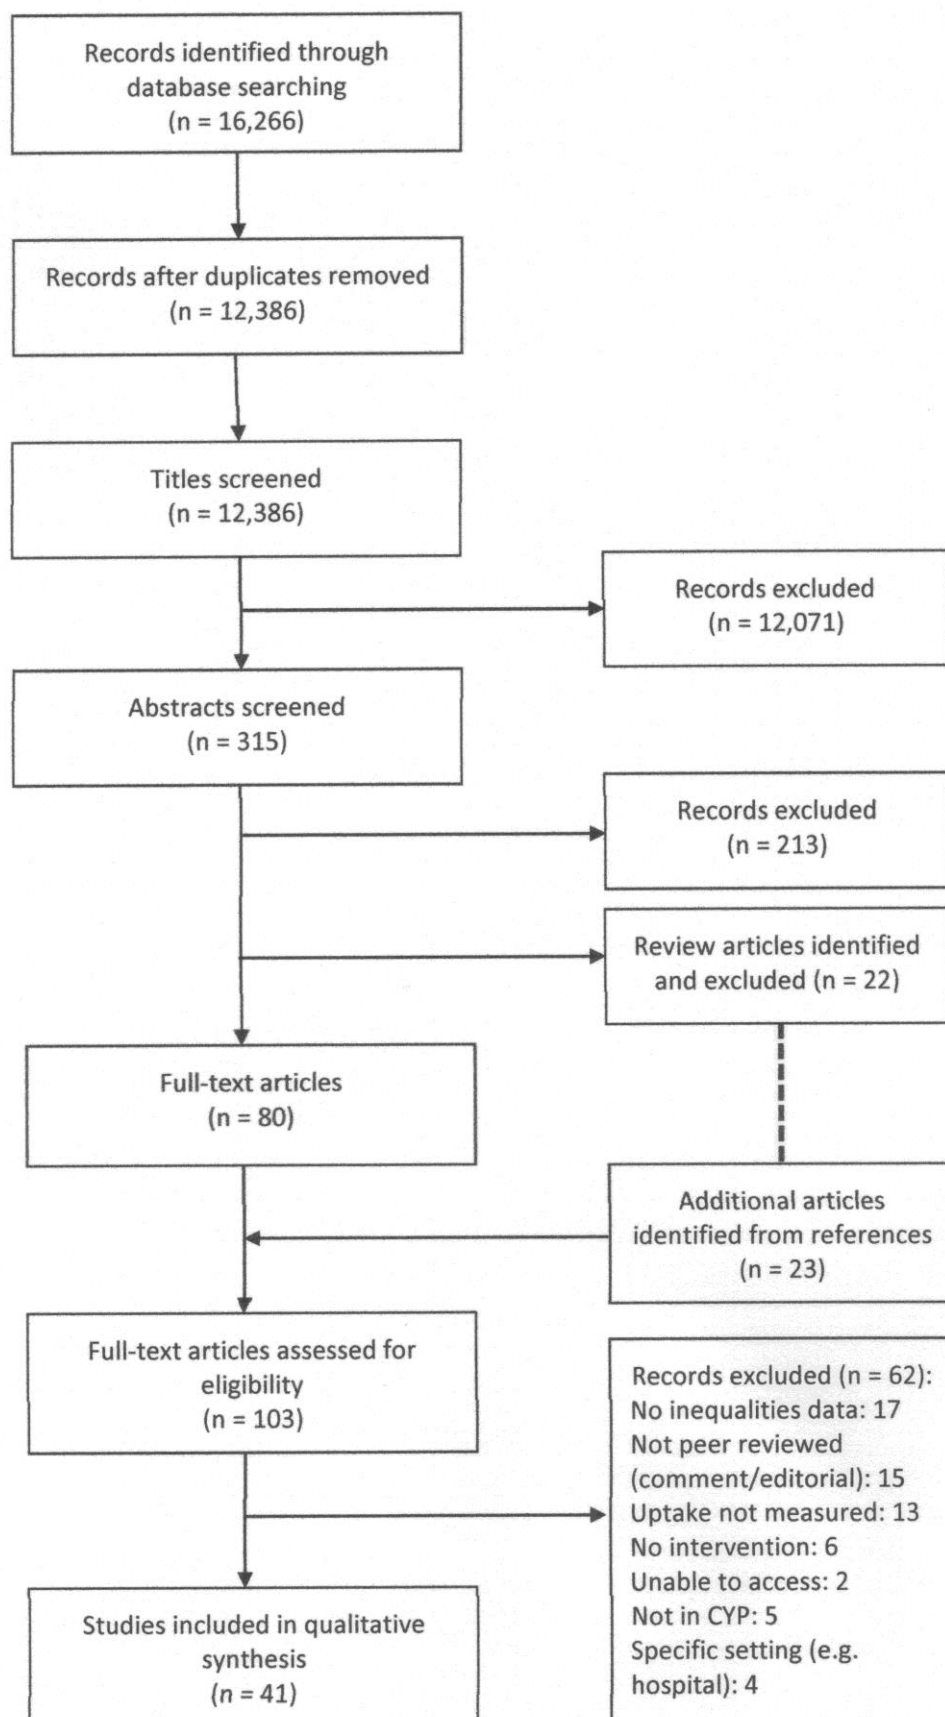

**Figure 1:** PRISMA flowchart of literature selection
